# Supplementary material for: Transcriptomic Characterizations of the Molecular Mechanisms Regulating Lipid Production and Composition in Mortierella alpina in Response to Cold Stress
Source: MDPI journal article supplement (doi:10.3390/agronomy12030599), 2022-02-28
Supplement: s1 [file s1]

**Table S2.** Primers and primer sequences used in the quantitative real-time PCR (qRT-PCR) analysis. “F” and “R” indicate the forward and reverse primers, respectively.

| <b>Primer</b>  | <b>Primer sequence</b> |
|----------------|------------------------|
| c6160_gl_i1-F  | CGGTCCTGATCTCGCTGTTC   |
| c6160_gl_i1-R  | GGCTGAATTCTTGTACCGCCA  |
| c11974_gl_i1-F | GCCCGGAATTCACCACAAAC   |
| c11974_gl_i1-R | GCCTCTGGTGAGTCCTTGACC  |
| c13286_gl_i1-F | CACAAAGTTCTTGAGCCGCC   |
| c13286_gl_i1-R | AAGTAGCCCTCGACTCTCGT   |
| c14468_gl_i1-F | GCTCGCTTATTTGGTCACGG   |
| c14468_gl_i1-R | TCTTGGCCATAGGAAGACCC   |
| c11922_gl_i1-F | CTCCTTCCTGTTCACGGCTT   |
| c11922_gl_i1-R | AGCATAGGCAGAACTGGAGC   |
| c12117_gl_i1-F | CCAGGACTATGCCTCGAACG   |
| c12117_gl_i1-R | ACAGGTGCTCGACCTTGTTG   |
| Actin-F        | AGTGGACTTATTCGGGCGTC   |
| Actin-R        | CTCGACCATGAACCTTGCCA   |
