# Supplementary material for: Transcriptomic Characterizations of the Molecular Mechanisms Regulating Lipid Production and Composition in Mortierella alpina in Response to Cold Stress
Source: MDPI journal article supplement (doi:10.3390/agronomy12030599), 2022-02-28
Supplement: s1 [file s1]

**Table S1.** RNA Quality of RNA in samples of *Mortierella aplina* determined by Nanodrop2000 micro UV-Vis spectrophotometer.

| Sample | Concentration<br>(ng/ $\mu$ L) | OD260/280 | OD260/230 |
|--------|--------------------------------|-----------|-----------|
| TA     | 845.99                         | 2.24      | 2.74      |
| TB     | 477.74                         | 2.07      | 2.50      |
| TC     | 784.53                         | 2.23      | 2.70      |
